# Supplementary material for: Au/Ti Synergistically Modified Supports Based on SiO2 with Different Pore Geometries and Architectures
Source: MDPI journal article supplement (doi:10.3390/catal12101129), 2022-09-28
Supplement: s1 [file s1]

Supplementary data

# Au/Ti Synergistically Modified Supports Based on SiO<sub>2</sub> with Different Pore Geometries and Architectures

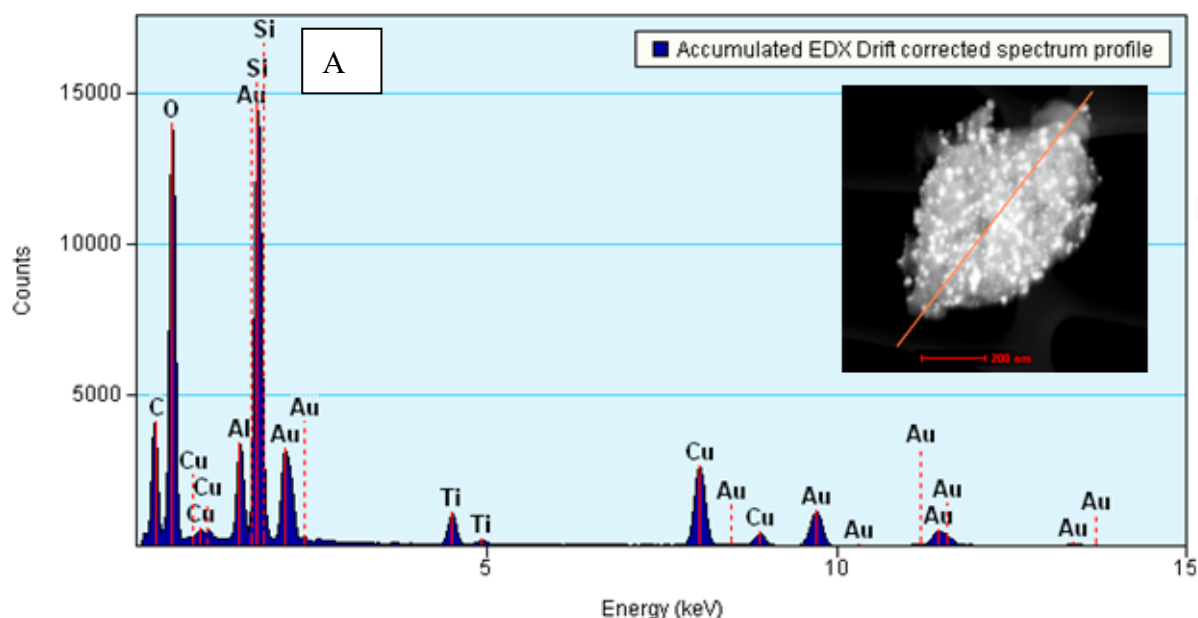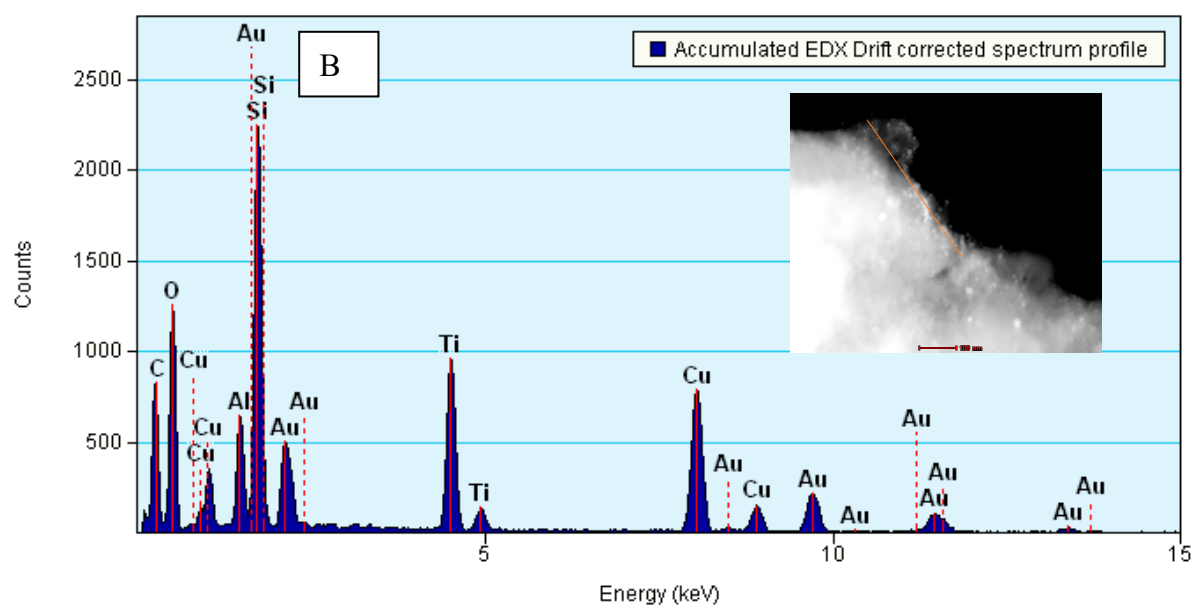

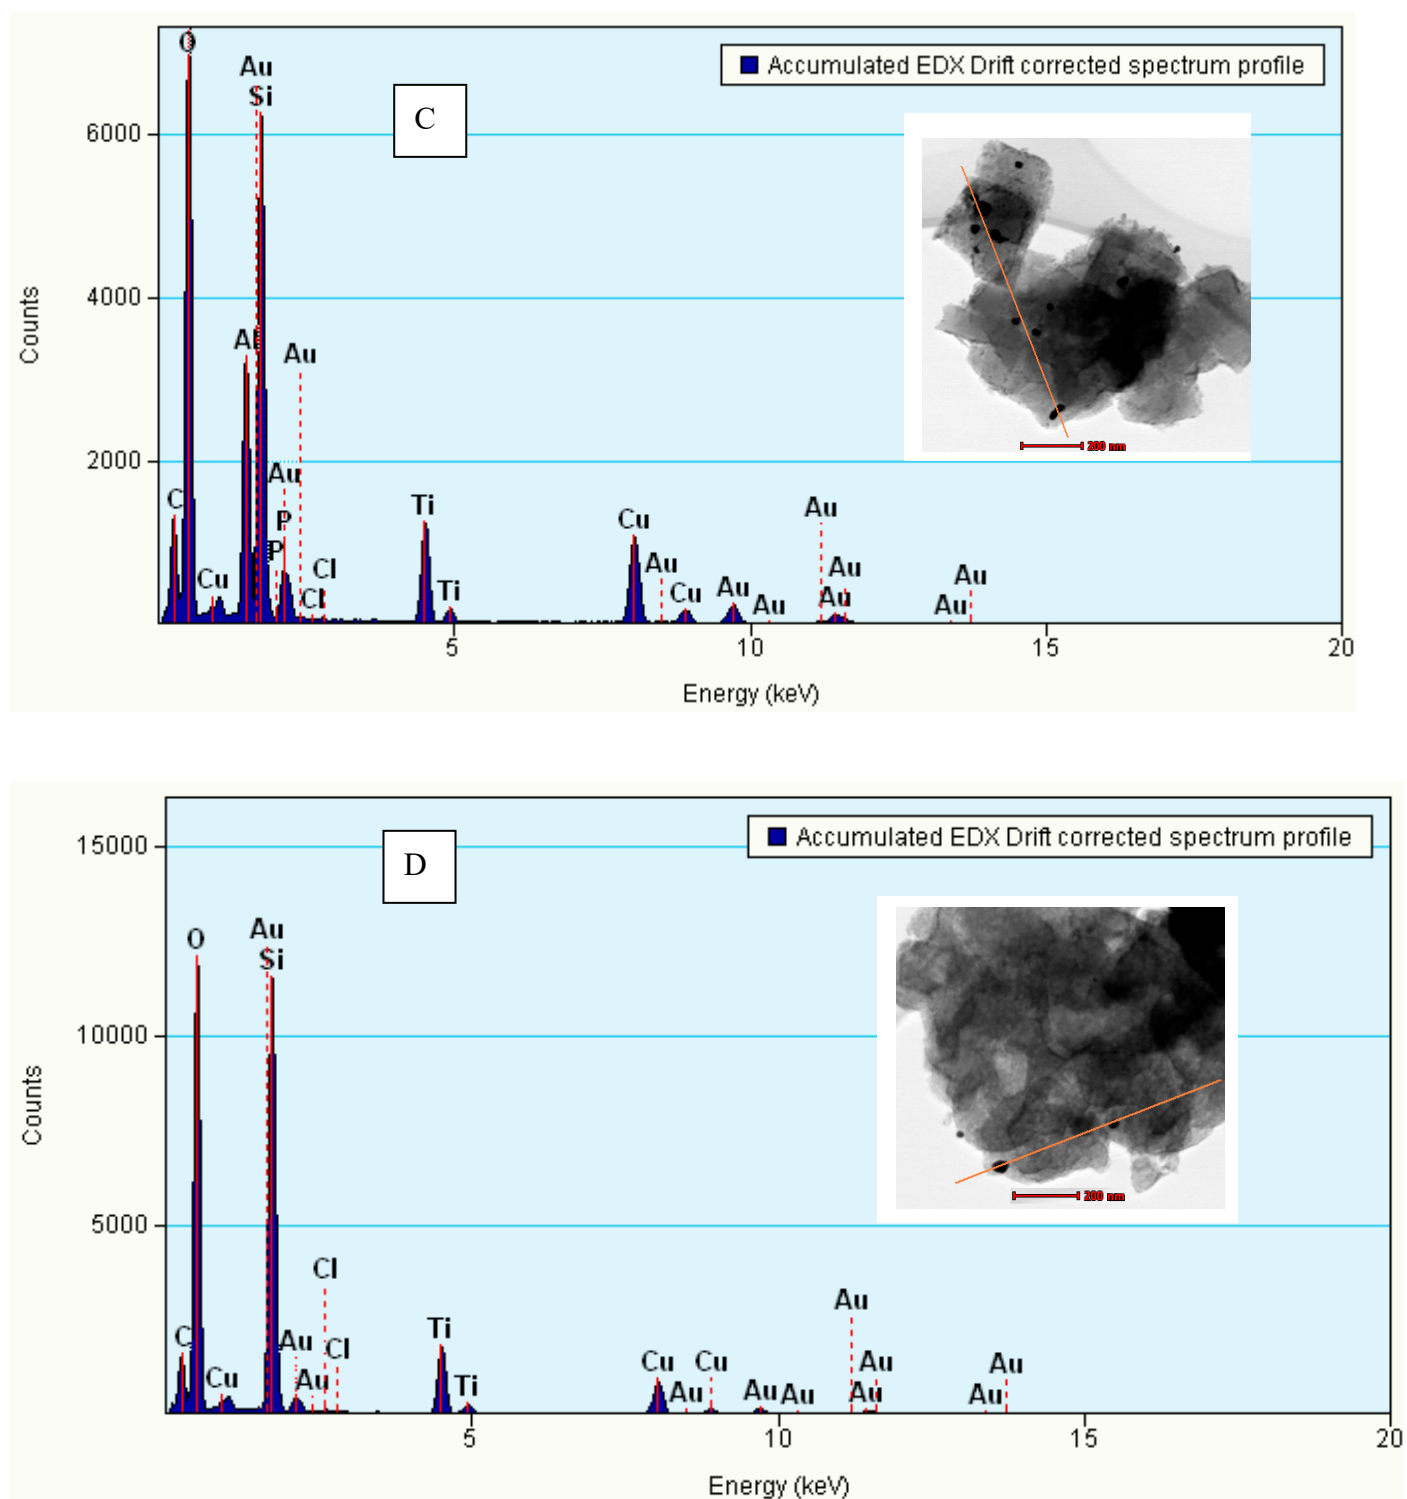

**Figure S1.** EDX results for KTA (A), hYTA (B), YTA (C) and MTA (D) samples and the TEM image of the evaluated area (Cu and C are components of TEM grid support for the powder of sample).

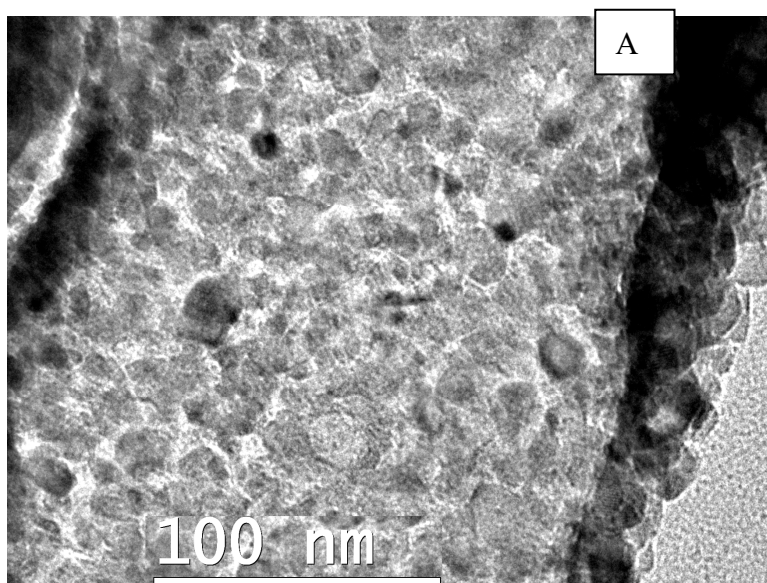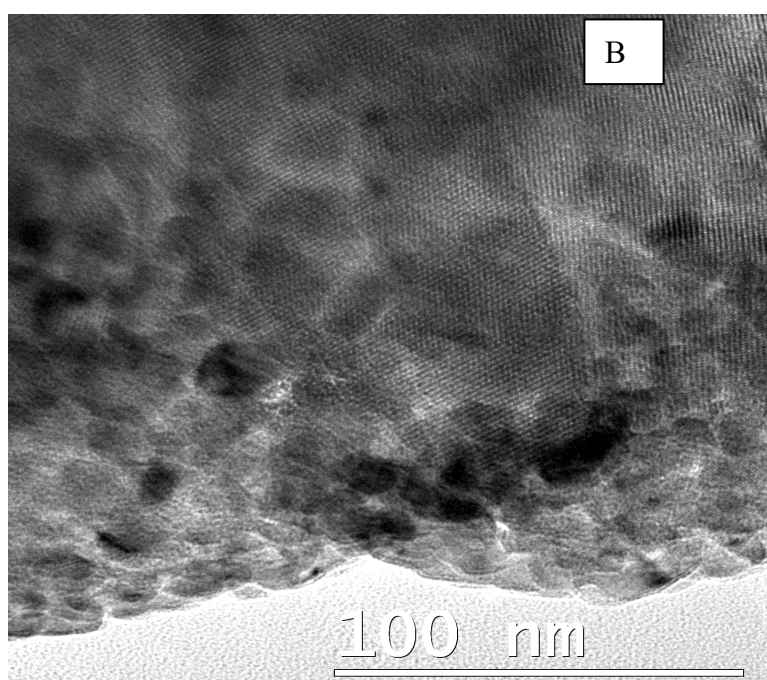

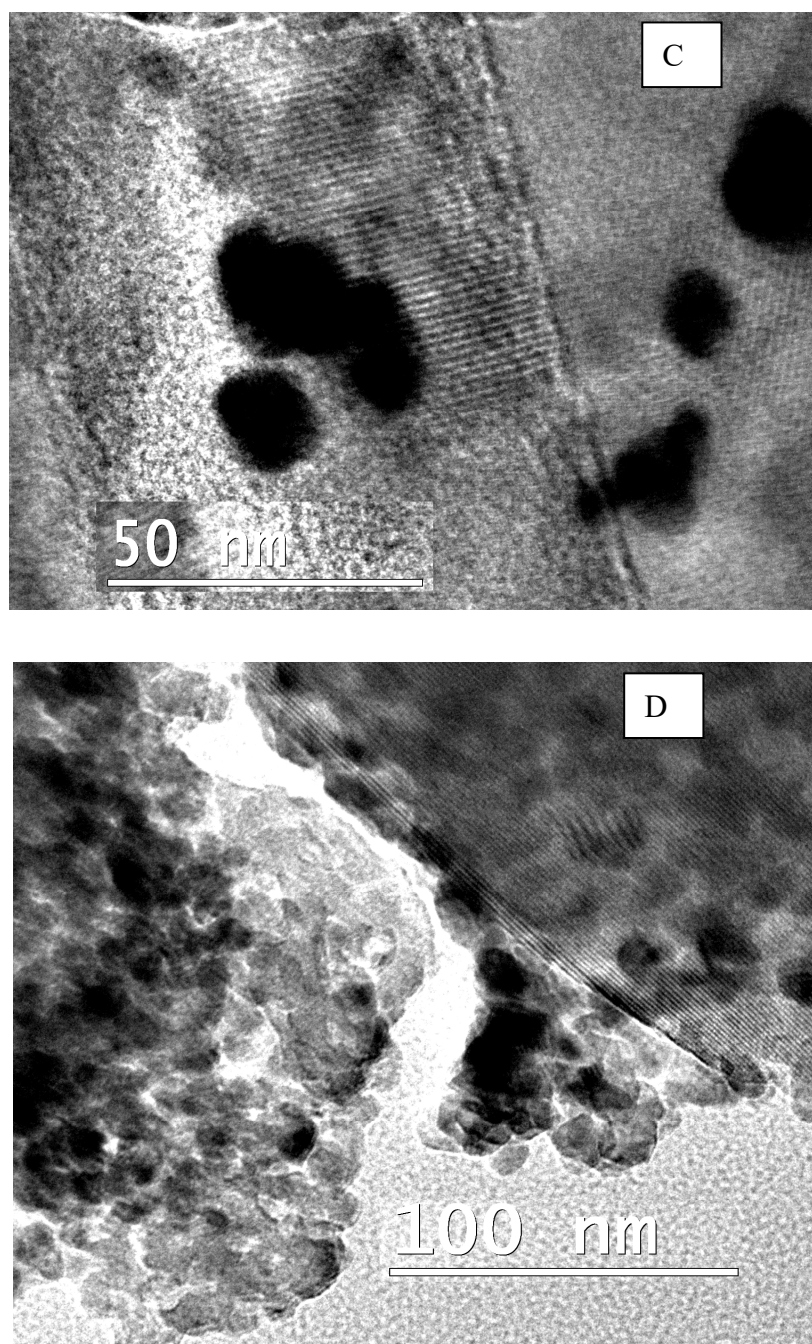

**Figure S2.** TEM images of samples MTA (A, B) and hYTA (C, D).



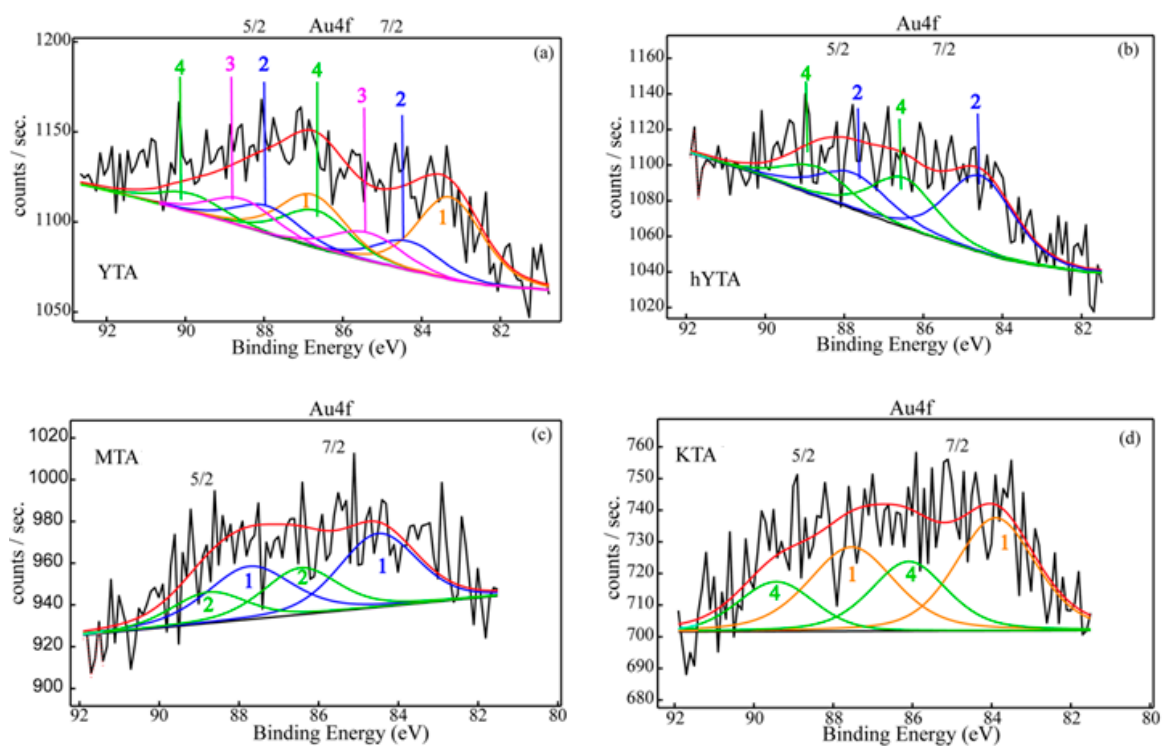

**Figure S3.** (a–d) Au 4f (7/2, 5/2) high resolution, deconvoluted XPS spectra for the synthesized samples.

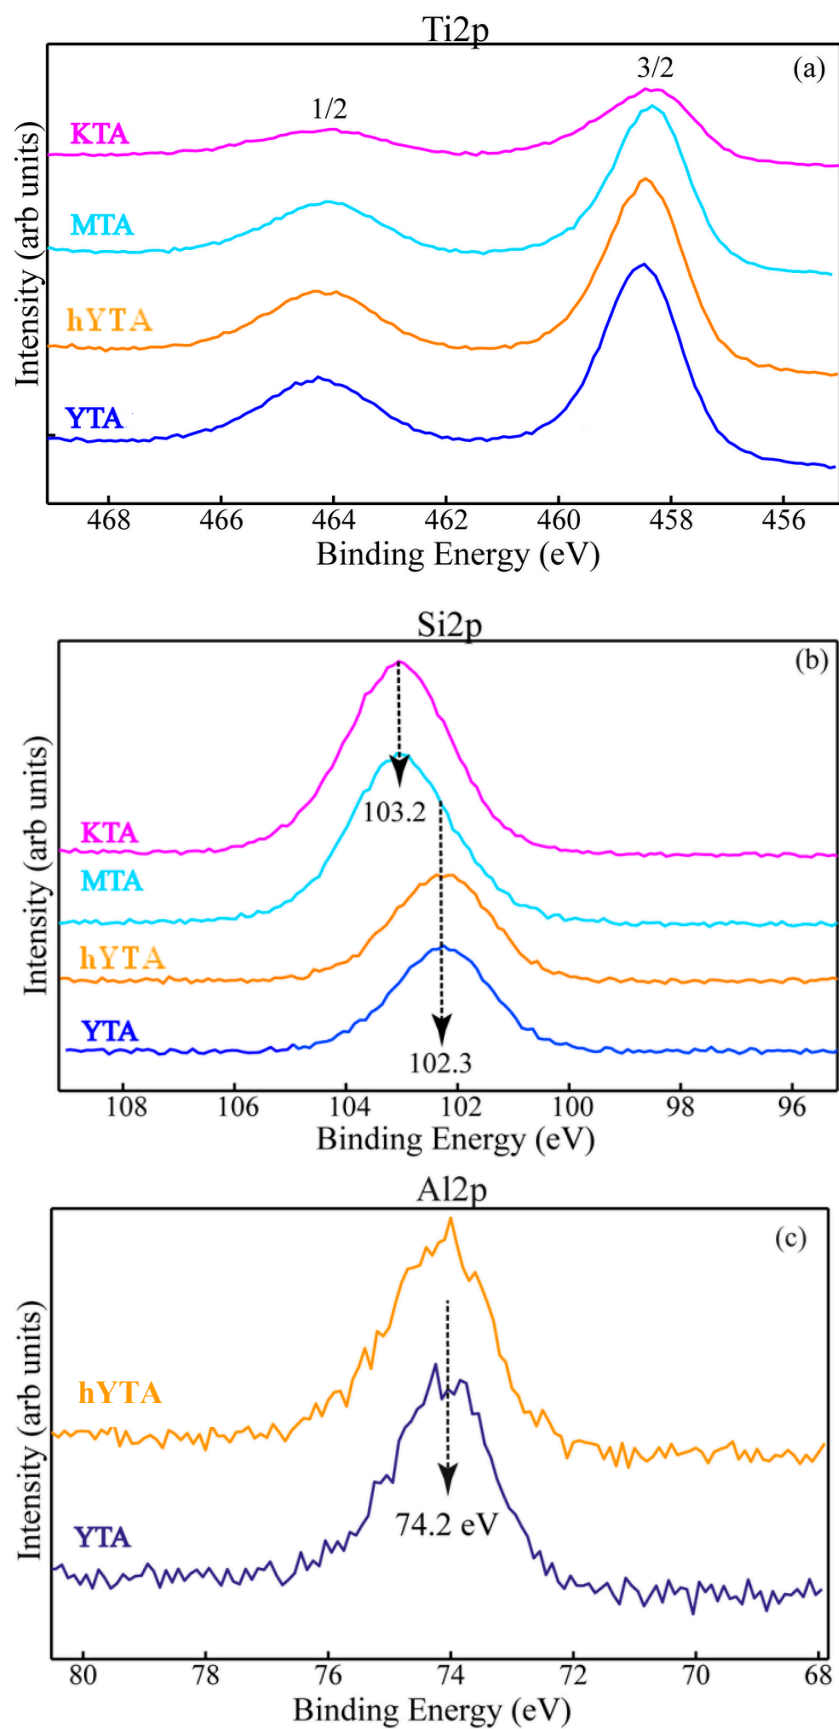

**Figure S4.** Ti2p (a), Si2p (b) and Al2p (c) high resolution XPS spectra.

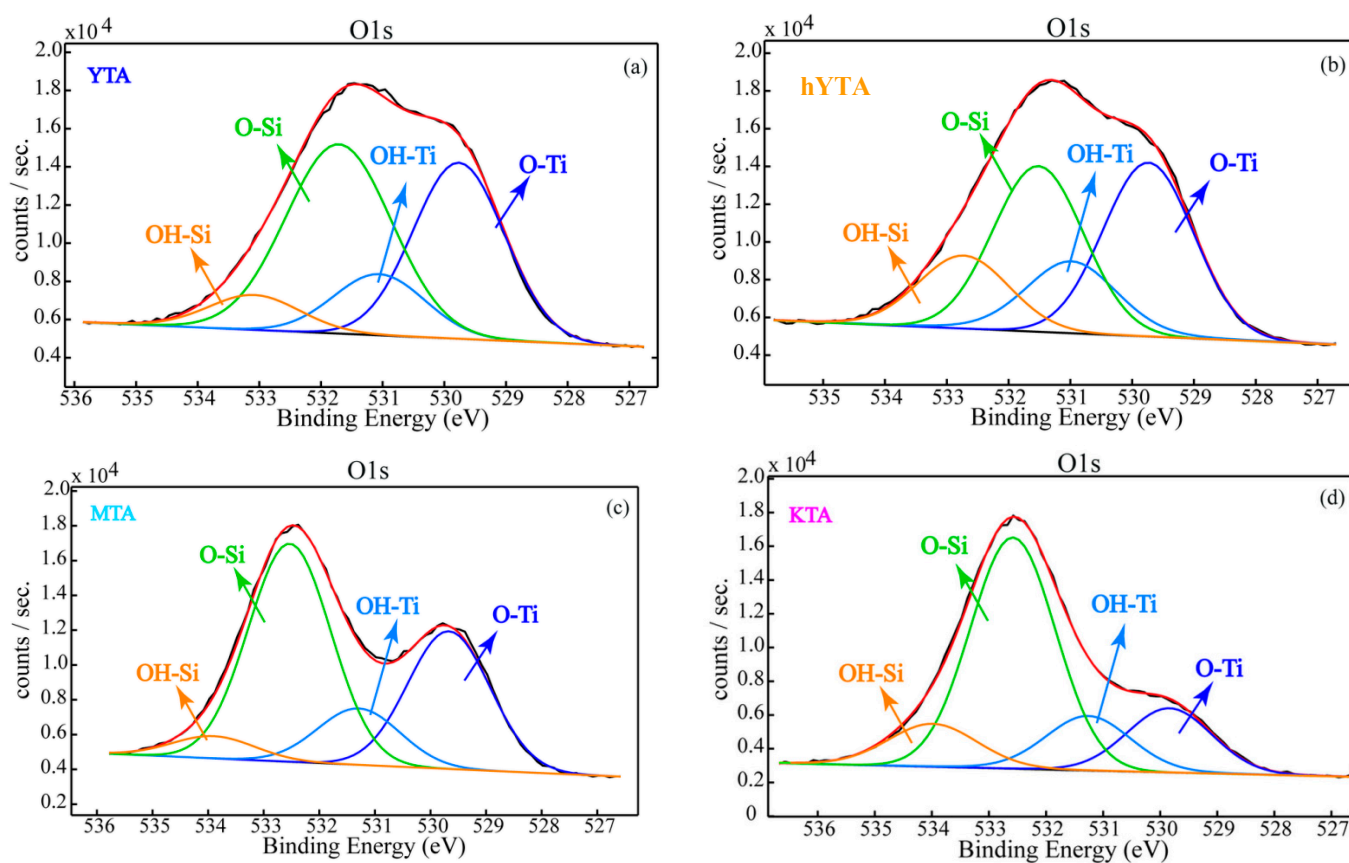

**Figure S5.** The deconvoluted O1s spectra for YTA (a), hYTA (b), MTA (c) and KTA (d)

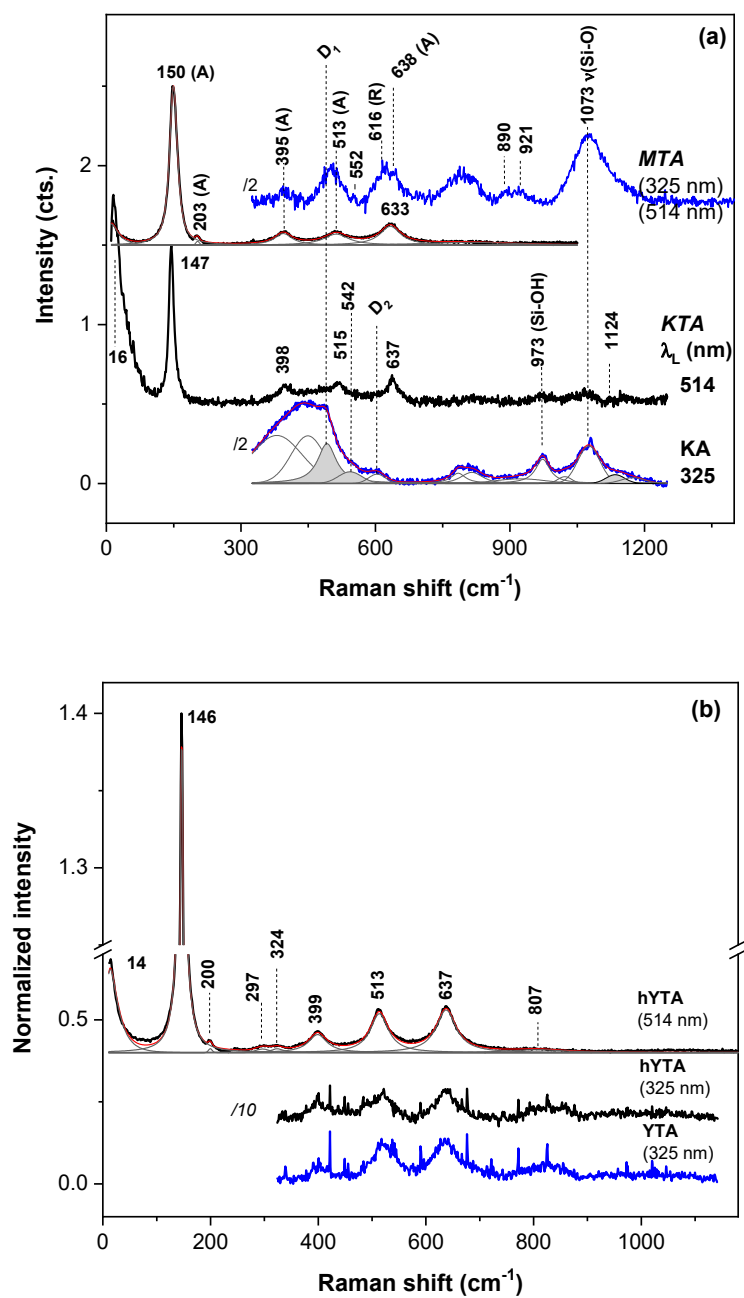

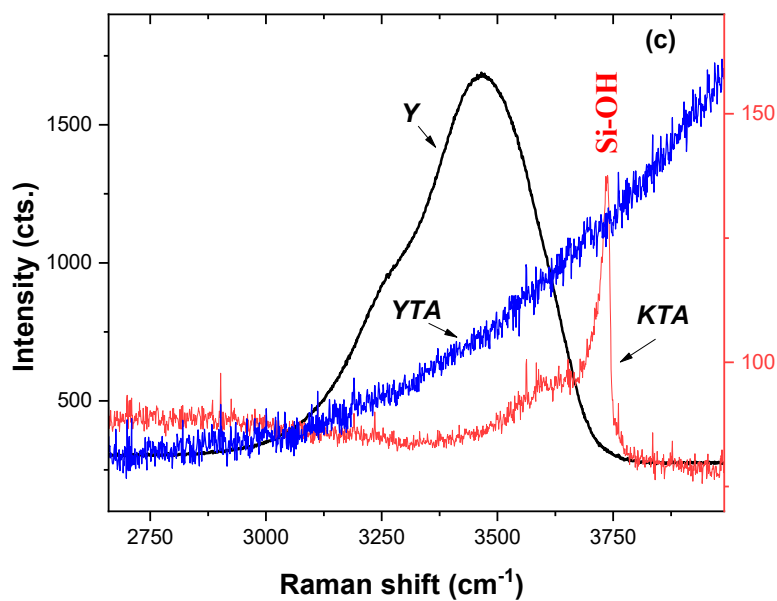

**Figure S6.** Raman spectra of the cubic mesoporous supported (M/K)TA photocatalysts (a), zeolite supported (hY/Y)TA photocatalysts (b) and Y, (Y/K)TA photocatalysts (c).  $\lambda_{\text{L}}$  is the laser excitation line and A is anatase.

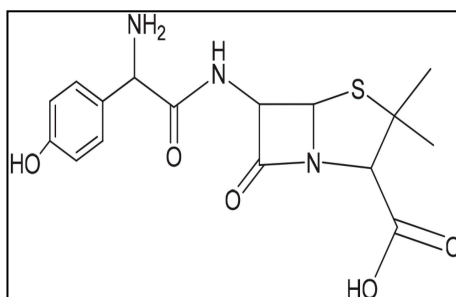

Figure S7. Chemical structure of amoxicillin (AMX).

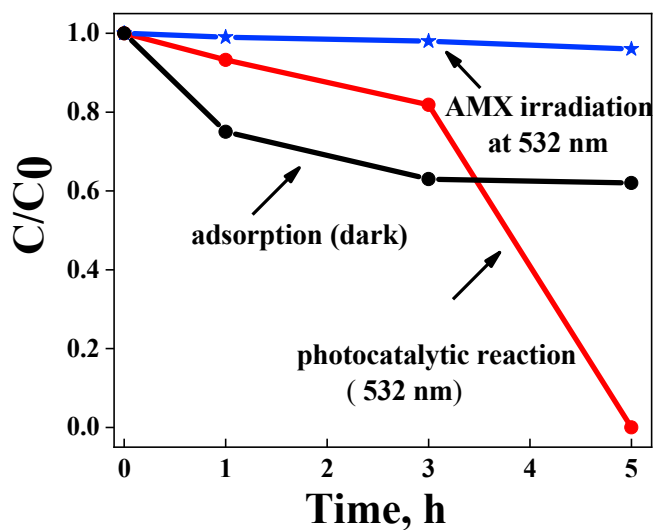

Figure S8. The processes that take place in the removal of amoxicillin (AMX) from water (YTA photocatalyst).

Table S1. Texture properties of samples and TiO<sub>2</sub> crystallite size of the samples after each impregnation step.

| Sample | BET surface area<br>(m <sup>2</sup> /g) | V <sub>pore</sub> (cm <sup>3</sup> /g) | Pore size (nm) | TiO <sub>2</sub> crystallite<br>size (nm) |
|--------|-----------------------------------------|----------------------------------------|----------------|-------------------------------------------|
| YT     | 678                                     | 0.107                                  | 1.8            | 10.2                                      |
| YTA    | 699                                     | 0.109                                  | 1.8            | 10.3                                      |
| hYT    | 406                                     | 0.214                                  | 2.5/4.2        | 10.3                                      |
| hYTA   | 547                                     | 0.178                                  | 2.0/5.2        | 10.2                                      |
| MT     | 435                                     | 0.251                                  | 2.5            | 14.8                                      |
| MTA    | 284                                     | 0.206                                  | 2.6            | 14.7                                      |
| KT     | 617                                     | 0.977                                  | 6.5            | -                                         |
| KTA    | 378                                     | 0.831                                  | 5.2            | -                                         |
