# Supplementary material for: Au/Ti Synergistically Modified Supports Based on SiO2 with Different Pore Geometries and Architectures
Source: MDPI journal article supplement (doi:10.3390/catal12101129), 2022-09-28
Supplement: s1 [file s1]

Archive with 1 entries (1 files):
- catalysts-1919258-supplementary.pdf
